# Supplementary material for: Stepwise photoconversion of an artificial light-harvesting array built from extended BODIPY units
Source: Royal Society of Chemistry journal article supplement (doi:10.1039/c5pp00021a), 2015-04-16
Supplement: c5pp00021a1.pdf [file c5pp00021a1.pdf]

## Stepwise photoconversion of an artificial light-harvesting array built from extended BODIPY units

Anthony Harriman, Patrycja Stachelek, Alexandra Sutter and Raymond Ziessel

### Supporting Information

|                                                                         |     |
|-------------------------------------------------------------------------|-----|
| Experimental details for synthesis of new compounds                     | S2  |
| Calculation of driving force                                            | S3  |
| Energy-minimized geometry and Cartesian coordinates for <b>1</b>        | S4  |
| Energy-minimized geometry and Cartesian coordinates for <b>A1</b>       | S8  |
| Energy-minimized geometry and Cartesian coordinates for <b>D1</b>       | S11 |
| Photolysis of <b>A1</b> in deoxygenated CH <sub>2</sub> Cl <sub>2</sub> | S13 |
| Absorption spectra showing early stage of photolysis                    | S14 |
| Absorption spectra showing later stages of photolysis                   | S15 |
| Kohn-Sham representation of important molecular orbitals for <b>A1</b>  | S16 |
| Kohn-Sham representation of molecular orbitals for <b>D1</b>            | S18 |

## Experimental details for synthesis of new compounds

**General features:**  $^1\text{H}$  and  $^{13}\text{C}$  spectra were recorded at rt on 300 and 400 MHz spectrometers using perdeuterated solvents as internal standards. Chemical shifts of  $^1\text{H}$  and  $^{13}\text{C}$  spectra are given in ppm relative to residual protiated solvent and relative to the solvent respectively.  $^{11}\text{B}$  spectra were recorded at rt on a 400 MHz spectrometer using  $\text{BF}_3\cdot\text{Et}_2\text{O}$  as reference. FT-IR spectra were recorded using a spectrometer equipped with an ATR “diamond” apparatus. Chromatographic purification was conducted using 40-63  $\mu\text{m}$  silica gel or aluminium oxide 90 standardized. Thin layer chromatography (TLC) was performed on silica gel or aluminium oxide plates coated with fluorescent indicator. All mixtures of solvents are given in v/v ratio. All anhydrous reactions were carried out under dry argon by using Schlenk tube techniques.

**Synthesis:** Preparation and characterization of compound **1**. To a degassed solution of **A1** (63 mg, 0.038 mmol) and **D1** (22 mg, 0.046 mmol) in benzene (10 mL) and triethylamine (2 mL) was added  $[\text{Pd}(\text{PPh}_3)_4]$  (10 mg). The resulting mixture was stirred at  $70^\circ\text{C}$  during 19 h and then was cooled to room temperature. After evaporation under vacuum, the organic product was extracted with  $\text{CH}_2\text{Cl}_2$ , washed with water and brine. The organic layer was dried over anhydrous  $\text{Na}_2\text{SO}_4$  and evaporated under vacuum. The crude product was purified by silica gel chromatography (from 50/50 to 40/60 Petroleum Ether/ $\text{CH}_2\text{Cl}_2$ ) to obtain a brown compound (62 mg, 81%) and recrystallized by diffusion of pentane into a THF solution. The resulting crystalline compound was washed with pentane to afford analytically derivative **1** (54 mg, 71%).  $^1\text{H}$  NMR (400 MHz, chloroform-d):  $\delta$  (ppm) 7.71 (d,  $^3\text{J} = 8.1$  Hz, 4 H), 7.47 - 7.56 (m, 8 H), 7.33 - 7.41 (m, 6 H), 7.20 - 7.31 (m, 12 H), 7.02 - 7.16 (m, 18 H), 6.69 (d,  $^3\text{J} = 9.0$  Hz, 2 H), 6.62 (s, 1 H), 6.61 (s, 2 H), 5.99 (s, 1 H), 3.04 (s, 6 H), 2.61 (s, 3 H), 1.82 - 1.95 (m, 8 H), 1.50 (s, 9 H), 1.45 (s, 3 H), 1.11 - 1.25 (m, 24 H), 0.94 - 1.07 (m, 8 H), 0.83 (t,  $\text{J} = 6.86$  Hz, 12 H).  $^{13}\text{C}$  NMR (101 MHz, chloroform -d):  $\delta$  (ppm) 160.5, 158.7, 155.2, 153.1,

151.9, 151.1, 147.4, 147.1, 146.2, 143.0, 142.6, 140.7, 140.4, 140.0, 138.2, 137.7, 135.9, 135.8, 135.3, 134.7, 133.6, 132.9, 132.2, 132.2, 130.9, 129.7, 129.3, 129.3, 129.2, 129.1, 128.8, 126.1, 124.6, 124.4, 123.9, 123.5, 123.5, 123.1, 122.4, 120.6, 117.9, 116.8, 116.1, 114.2, 112.0, 90.0, 68.0, 54.0, 53.4, 40.2, 38.0, 34.1, 31.6, 29.7, 25.6, 24.5, 22.7, 22.3, 14.9, 14.8, 14.6, 14.5, 14.0. EI-MS, m/z (%) 2000.1 (100.0%), 1981.1 (35), 1963.2 (15). Anal. Calcd for C<sub>129</sub>H<sub>127</sub>B<sub>2</sub>F<sub>4</sub>N<sub>7</sub>S<sub>4</sub>: C, 77.42; H, 6.40; N, 4.90; found C, 77.20; H, 6.09; N, 4.68.

### Calculation of the thermodynamic driving force for intramolecular electron transfer

To examine the free-energy gap ( $\Delta G_{CS}$ ) for light-induced electron transfer occurring within the target compound, we use the following expression:

$$\Delta G_{CS} = \Delta E(S_1) - (E_{OX} - E_{RED}) - \Delta G_S \quad (S1)$$

Here,  $\Delta E(S_1)$  refers to the excitation energy of the relevant excited-singlet state as determined from the crossover point for normalized absorption and fluorescence spectra recorded in CH<sub>2</sub>Cl<sub>2</sub>. The terms,  $E_{OX}$  and  $E_{RED}$  refer respectively to the half-wave potentials for one-electron oxidation and reduction of the chromophore. Also required is the electrostatic correction term,  $\Delta G_S$ , which is evaluated from the following expression:

$$\Delta G_S = \frac{z_D z_A e^2}{4\pi\epsilon_0\epsilon_S R_{DA}} \quad (S2)$$

Here,  $Z$  refers to the electronic charge,  $\epsilon_S$  is the static dielectric constant of the solvent and  $R_{DA}$  is the separation distance between the charges.

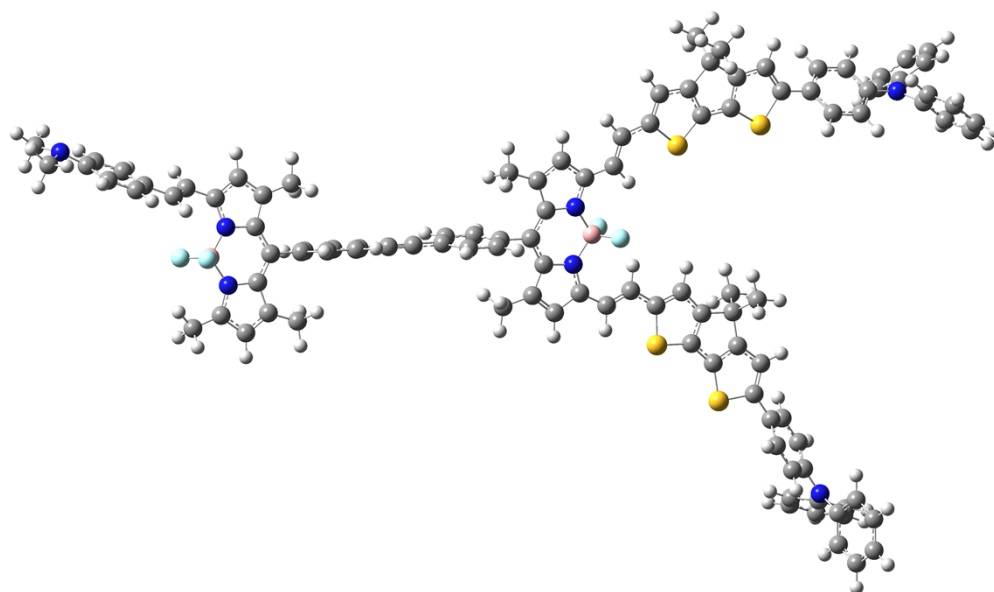

**Figure S1.** Energy-minimized geometry computed for the target compound **1**. The Cartesian coordinates are provided below:

|    |   |            |             |              |
|----|---|------------|-------------|--------------|
| 1  | C | 0.00000000 | 0.00000000  | 0.00000000   |
| 2  | C | 1.52760457 | 0.00000000  | 0.00000000   |
| 3  | C | 2.10011223 | 1.41614985  | 0.00000000   |
| 4  | C | 2.07952775 | -0.81716878 | -1.17631217  |
| 5  | C | 2.81677584 | -1.91202629 | -0.72121841  |
| 6  | S | 3.43356209 | -2.82234380 | -2.03655340  |
| 7  | C | 2.70868466 | -1.72532680 | -3.21399586  |
| 8  | C | 2.88395877 | -2.01016562 | -4.62481552  |
| 9  | C | 1.76619665 | -2.03018784 | -5.48039122  |
| 10 | C | 1.91400262 | -2.30303954 | -6.83623064  |
| 11 | C | 3.19576131 | -2.57123920 | -7.36280637  |
| 12 | N | 3.35391415 | -2.85765881 | -8.75309404  |
| 13 | C | 2.30423699 | -3.51676159 | -9.48788905  |
| 14 | C | 1.99195890 | -3.08654745 | -10.79149391 |
| 15 | C | 0.98000120 | -3.73422840 | -11.50085644 |
| 16 | C | 0.27491679 | -4.79541139 | -10.92403373 |
| 17 | C | 0.58848674 | -5.21602417 | -9.62769286  |
| 18 | C | 1.60259260 | -4.58789337 | -8.90364309  |
| 19 | C | 4.56483254 | -2.49464089 | -9.44347529  |
| 20 | C | 5.17813526 | -1.25437920 | -9.18412246  |
| 21 | C | 6.34859735 | -0.91532038 | -9.86368790  |
| 22 | C | 6.90551838 | -1.79092538 | -10.80127674 |
| 23 | C | 6.28721547 | -3.01849728 | -11.05939032 |
| 24 | C | 5.12096807 | -3.38146346 | -10.38478378 |
| 25 | C | 4.31977581 | -2.55451696 | -6.50986515  |
| 26 | C | 4.15953031 | -2.27246171 | -5.15659223  |
| 27 | C | 2.01917140 | -0.71449199 | -2.59561941  |
| 28 | C | 2.81818445 | -1.91532363 | 0.70758741   |
| 29 | C | 2.08051954 | -0.82058431 | 1.17158562   |
| 30 | C | 2.01635354 | -0.73575792 | 2.58625958   |
| 31 | C | 2.70141475 | -1.76208375 | 3.20201784   |
| 32 | S | 3.42946215 | -2.83575152 | 2.01226618   |

|      |             |             |             |
|------|-------------|-------------|-------------|
| 33 C | 2.84023044  | -1.99486672 | 4.61902785  |
| 34 C | 3.55328496  | -3.00296149 | 5.15297496  |
| 35 C | 3.76146456  | -3.34273304 | 6.54981239  |
| 36 C | 4.43252954  | -4.57345248 | 6.91158929  |
| 37 C | 4.51024752  | -4.64757399 | 8.29104294  |
| 38 C | 5.11577556  | -5.73841787 | 9.07082223  |
| 39 C | 3.88502485  | -3.44648884 | 8.82253471  |
| 40 N | 3.43820249  | -2.67900549 | 7.69386860  |
| 41 B | 2.71274259  | -1.31286925 | 7.90076800  |
| 42 F | 1.44191275  | -1.35711189 | 7.35523419  |
| 43 F | 3.37398657  | -0.31286647 | 7.21225331  |
| 44 N | 2.60419277  | -0.93614320 | 9.40834985  |
| 45 C | 2.05295773  | 0.17773734  | 9.97431299  |
| 46 C | 1.44827765  | 1.27186211  | 9.23117999  |
| 47 C | 0.92661119  | 2.35231061  | 9.84465028  |
| 48 C | 0.31422407  | 3.46934168  | 9.17393929  |
| 49 C | -0.23487969 | 4.59771389  | 9.74523959  |
| 50 C | -0.74862391 | 5.49419513  | 8.77277451  |
| 51 C | -1.44778599 | 6.85916269  | 8.80349118  |
| 52 C | -2.79075929 | 6.77435835  | 9.52655365  |
| 53 C | -0.54025104 | 7.93008708  | 9.40605217  |
| 54 C | -1.64430864 | 7.08817051  | 7.29863520  |
| 55 C | -1.13398443 | 6.01828113  | 6.56120631  |
| 56 S | -1.35241558 | 6.27534924  | 4.88038713  |
| 57 C | -2.12692988 | 7.83671687  | 5.15803020  |
| 58 C | -2.59041983 | 8.59222785  | 4.01054615  |
| 59 C | -3.90656933 | 9.09081683  | 3.98358145  |
| 60 C | -4.36887604 | 9.81644522  | 2.89062031  |
| 61 C | -3.51479680 | 10.05109782 | 1.79162934  |
| 62 N | -3.98385229 | 10.78980531 | 0.66292653  |
| 63 C | -5.37351966 | 10.74442452 | 0.28477213  |
| 64 C | -6.02235104 | 11.92524495 | -0.12319791 |
| 65 C | -7.36564415 | 11.87269692 | -0.49673251 |
| 66 C | -8.06667770 | 10.66304694 | -0.46017222 |
| 67 C | -7.41673096 | 9.49429712  | -0.05107808 |
| 68 C | -6.07141659 | 9.52261844  | 0.31853939  |
| 69 C | -3.07717651 | 11.59294067 | -0.11670582 |
| 70 C | -2.08971252 | 12.36417662 | 0.52489902  |
| 71 C | -1.22135337 | 13.13971106 | -0.24419615 |
| 72 C | -1.33293956 | 13.16165996 | -1.63801448 |
| 73 C | -2.32036110 | 12.39801024 | -2.26879221 |
| 74 C | -3.19300859 | 11.60801014 | -1.51969973 |
| 75 C | -2.19456766 | 9.55349566  | 1.81266853  |
| 76 C | -1.74144053 | 8.83676919  | 2.91597904  |
| 77 C | -2.20992510 | 8.12090362  | 6.49666763  |
| 78 C | -0.59002433 | 5.04684455  | 7.45669164  |
| 79 S | 0.18507870  | 3.52328114  | 7.41901729  |
| 80 C | 2.17625399  | 0.06841020  | 11.40315385 |
| 81 C | 2.81118904  | -1.13329072 | 11.69853899 |
| 82 C | 3.13203329  | -1.63893128 | 13.04288027 |
| 83 C | 3.09308096  | -1.79199571 | 10.43978801 |
| 84 C | 3.71063248  | -3.01295114 | 10.13639404 |
| 85 C | 4.19506756  | -3.86183769 | 11.25512569 |
| 86 C | 3.34724710  | -4.83205962 | 11.81020191 |
| 87 C | 3.80040000  | -5.63029083 | 12.86014297 |
| 88 C | 5.10564830  | -5.45969321 | 13.35993234 |
| 89 C | 5.56722840  | -6.27151425 | 14.42501337 |
| 90 C | 5.96425392  | -6.96562418 | 15.33315578 |
| 91 C | 6.42469625  | -7.77750029 | 16.39873958 |
| 92 C | 7.62583423  | -7.45802936 | 17.06008799 |
| 93 C | 8.07818926  | -8.25875855 | 18.10856635 |

|       |             |              |              |
|-------|-------------|--------------|--------------|
| 94 C  | 7.33609130  | -9.38317430  | 18.49922989  |
| 95 C  | 7.82220192  | -10.23606643 | 19.61463353  |
| 96 C  | 8.63921018  | -11.32800832 | 19.32619037  |
| 97 C  | 9.13670340  | -11.87017086 | 18.07303732  |
| 98 C  | 8.87692510  | -11.33012511 | 16.72913745  |
| 99 C  | 9.89140199  | -12.99414592 | 18.37666010  |
| 100 C | 9.88950305  | -13.16764462 | 19.80720106  |
| 101 C | 10.58080101 | -14.25015588 | 20.52817248  |
| 102 N | 9.14403910  | -12.18044369 | 20.36655795  |
| 103 B | 8.88557346  | -11.88156364 | 21.87531525  |
| 104 F | 10.09311260 | -11.57751821 | 22.48044347  |
| 105 F | 8.43916765  | -13.00766628 | 22.53891615  |
| 106 C | 7.42845758  | -9.93147310  | 20.92355723  |
| 107 N | 7.87238756  | -10.70996342 | 22.04201748  |
| 108 C | 7.24861727  | -10.26488842 | 23.16648767  |
| 109 C | 7.36134573  | -10.80386162 | 24.51335833  |
| 110 C | 8.51096830  | -11.04700022 | 25.16316310  |
| 111 C | 8.59296015  | -11.58684606 | 26.52184315  |
| 112 C | 7.49072316  | -12.17468951 | 27.16871706  |
| 113 C | 7.59979712  | -12.68594882 | 28.45633675  |
| 114 C | 8.82662057  | -12.60661869 | 29.15944475  |
| 115 N | 8.89952283  | -12.96211327 | 30.53206537  |
| 116 C | 10.24949306 | -13.26043838 | 31.08466987  |
| 117 C | 7.87975489  | -13.92552898 | 31.03360122  |
| 118 C | 9.94240994  | -12.03170763 | 28.50109359  |
| 119 C | 9.82014485  | -11.53035821 | 27.21204832  |
| 120 C | 6.40158098  | -9.15493271  | 22.81644112  |
| 121 C | 6.51570524  | -8.93557408  | 21.44916541  |
| 122 C | 5.83009982  | -7.88571962  | 20.67785686  |
| 123 C | 6.13822615  | -9.70605664  | 17.84398469  |
| 124 C | 5.68283586  | -8.90625313  | 16.79645280  |
| 125 C | 5.95141895  | -4.48352809  | 12.79933087  |
| 126 C | 5.49753716  | -3.68919158  | 11.74698432  |
| 127 H | -0.39846772 | 0.51093972   | 0.88518567   |
| 128 H | -0.39921915 | 0.51160919   | -0.88426105  |
| 129 H | -0.40540432 | -1.01971806  | 0.00054453   |
| 130 H | 3.19751460  | 1.40992384   | -0.00012288  |
| 131 H | 1.77508499  | 1.97813194   | -0.88385117  |
| 132 H | 1.77666908  | 1.97708714   | 0.88566922   |
| 133 H | 0.77196537  | -1.82642910  | -5.07574109  |
| 134 H | 1.03835565  | -2.30380714  | -7.48669750  |
| 135 H | 2.53461529  | -2.25688557  | -11.24425302 |
| 136 H | 0.73592761  | -3.40479017  | -12.51249140 |
| 137 H | -0.51612411 | -5.29317924  | -11.48322530 |
| 138 H | 0.04063456  | -6.04577185  | -9.17722656  |
| 139 H | 1.84777618  | -4.92721304  | -7.89732357  |
| 140 H | 4.74497067  | -0.56312385  | -8.46141118  |
| 141 H | 6.82851513  | 0.04434874   | -9.66287848  |
| 142 H | 7.81790642  | -1.51729296  | -11.32928570 |
| 143 H | 6.72077782  | -3.70288249  | -11.79092982 |
| 144 H | 4.64730468  | -4.34198274  | -10.58705111 |
| 145 H | 5.31486741  | -2.76667199  | -6.90335587  |
| 146 H | 5.03794505  | -2.25647437  | -4.50649591  |
| 147 H | 1.49016148  | 0.07985790   | -3.10747795  |
| 148 H | 1.48437183  | 0.05231174   | 3.10799239   |
| 149 H | 2.29262131  | -1.26745745  | 5.23071219   |
| 150 H | 4.08037342  | -3.71042165  | 4.48993634   |
| 151 H | 4.79830205  | -5.29258224  | 6.20210894   |
| 152 H | 4.38706001  | -6.21734278  | 9.74663693   |
| 153 H | 5.52591353  | -6.53554162  | 8.43019439   |
| 154 H | 5.94538254  | -5.38240941  | 9.70488093   |

|       |             |              |             |
|-------|-------------|--------------|-------------|
| 155 H | 1.43751362  | 1.17260713   | 8.14022447  |
| 156 H | 0.94486433  | 2.43816009   | 10.94304232 |
| 157 H | -0.27623884 | 4.79406432   | 10.81035558 |
| 158 H | -2.65771962 | 6.52951106   | 10.58743944 |
| 159 H | -3.33379358 | 7.72569629   | 9.47222857  |
| 160 H | -3.43729484 | 6.00198514   | 9.09096492  |
| 161 H | 0.42375475  | 7.98422434   | 8.88439008  |
| 162 H | -1.00144691 | 8.92352311   | 9.34670104  |
| 163 H | -0.32942962 | 7.72572262   | 10.46276711 |
| 164 H | -4.57086845 | 8.90866280   | 4.83165887  |
| 165 H | -5.38821483 | 10.20470323  | 2.89081418  |
| 166 H | -5.48245041 | 12.87162729  | -0.14888515 |
| 167 H | -7.87200695 | 12.78571310  | -0.81534608 |
| 168 H | -9.11613651 | 10.63136660  | -0.74975049 |
| 169 H | -7.96210229 | 8.54909926   | -0.02439529 |
| 170 H | -5.56889009 | 8.60604691   | 0.62734892  |
| 171 H | -2.00230190 | 12.35876880  | 1.61121124  |
| 172 H | -0.45242545 | 13.73663767  | 0.24978002  |
| 173 H | -0.65286076 | 13.77189776  | -2.23066605 |
| 174 H | -2.40855273 | 12.41435948  | -3.35666648 |
| 175 H | -3.95690090 | 11.01130116  | -2.01788412 |
| 176 H | -1.52698600 | 9.72276656   | 0.96661026  |
| 177 H | -0.71531425 | 8.46076345   | 2.92424181  |
| 178 H | -2.64453005 | 9.02050113   | 6.91444849  |
| 179 H | 1.82889704  | 0.80226438   | 12.10509034 |
| 180 H | 4.21651861  | -1.78844969  | 13.17903057 |
| 181 H | 2.80271560  | -0.95378602  | 13.83986214 |
| 182 H | 2.65415178  | -2.61302560  | 13.24170763 |
| 183 H | 2.33450359  | -4.96310241  | 11.42153736 |
| 184 H | 3.14427657  | -6.38782782  | 13.29403927 |
| 185 H | 8.20151615  | -6.58222735  | 16.75361766 |
| 186 H | 9.00937299  | -8.01037026  | 18.62317287 |
| 187 H | 7.80131540  | -11.33600474 | 16.48422633 |
| 188 H | 9.21343228  | -10.28392192 | 16.63264072 |
| 189 H | 9.38634091  | -11.90386659 | 15.93885664 |
| 190 H | 10.40081182 | -13.64194287 | 17.68956564 |
| 191 H | 10.07406118 | -15.21900380 | 20.36627937 |
| 192 H | 11.61668502 | -14.37308233 | 20.16710011 |
| 193 H | 10.64459564 | -14.11009798 | 21.61835323 |
| 194 H | 6.38636058  | -10.97372747 | 24.98837744 |
| 195 H | 9.47828027  | -10.81671480 | 24.70139070 |
| 196 H | 6.53202615  | -12.24328797 | 26.64821116 |
| 197 H | 6.72592932  | -13.13981574 | 28.92276939 |
| 198 H | 10.96218702 | -12.45999770 | 30.81802512 |
| 199 H | 10.19387225 | -13.28901635 | 32.18689954 |
| 200 H | 10.66528371 | -14.22057640 | 30.73800235 |
| 201 H | 7.96044154  | -14.92795113 | 30.58207992 |
| 202 H | 7.97886320  | -14.03557411 | 32.12685315 |
| 203 H | 6.86462630  | -13.53731526 | 30.83862244 |
| 204 H | 10.90694656 | -11.97310516 | 29.00587208 |
| 205 H | 10.69395360 | -11.08749204 | 26.72733796 |
| 206 H | 5.80264756  | -8.60598254  | 23.51709733 |
| 207 H | 5.21982335  | -7.22701859  | 21.31529279 |
| 208 H | 6.54230434  | -7.23929361  | 20.13800880 |
| 209 H | 5.15281407  | -8.30930190  | 19.91741049 |
| 210 H | 5.56274789  | -10.58167194 | 18.15336687 |
| 211 H | 4.75073177  | -9.15345891  | 16.28422994 |
| 212 H | 6.96312200  | -4.34938227  | 13.18779438 |
| 213 H | 6.15423550  | -2.93249197  | 11.31113381 |

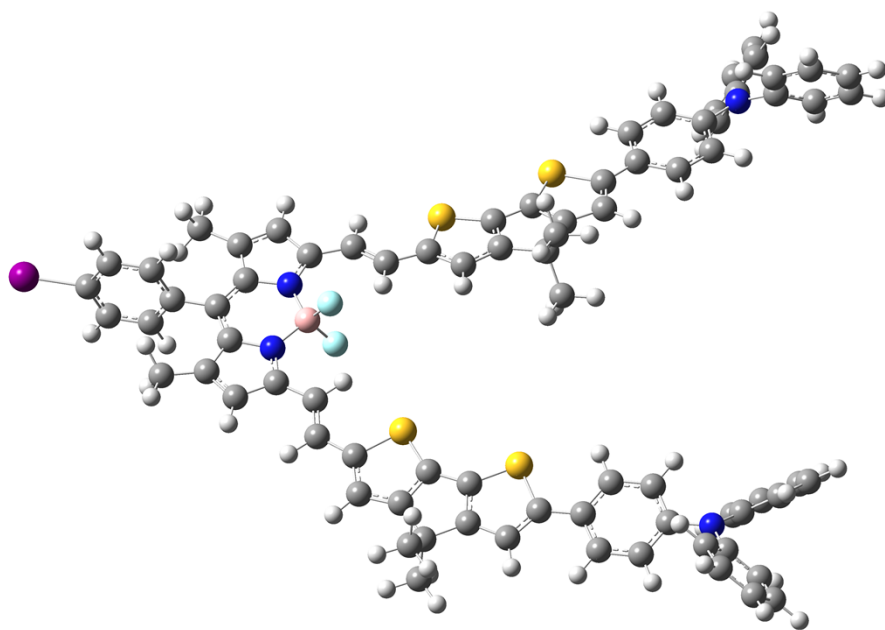

**Figure S2.** The energy-minimized geometry computed for **A1**. The Cartesian coordinates are given below:

|    |   |             |             |             |
|----|---|-------------|-------------|-------------|
| 1  | I | 0.00000000  | 0.00000000  | 0.00000000  |
| 2  | C | 2.11307398  | 0.00000000  | 0.00000000  |
| 3  | C | 2.79286589  | 1.21646379  | 0.00000000  |
| 4  | C | 4.19139561  | 1.21717229  | -0.00005648 |
| 5  | C | 2.79182089  | -1.21721215 | 0.00006965  |
| 6  | C | 4.19020677  | -1.21807655 | 0.00478661  |
| 7  | C | 4.88729998  | -0.00076852 | 0.00175975  |
| 8  | C | 6.37334615  | 0.00124096  | 0.01999475  |
| 9  | C | 7.07025362  | 0.15670101  | -1.17748941 |
| 10 | N | 8.50539031  | 0.19024086  | -1.23175166 |
| 11 | B | 9.35277831  | 0.06082276  | 0.07219608  |
| 12 | F | 10.12109624 | 1.19698074  | 0.25692427  |
| 13 | F | 10.25491234 | -0.97965813 | -0.04374136 |
| 14 | N | 8.45467127  | -0.15017711 | 1.32725304  |
| 15 | C | 7.02990435  | -0.15033362 | 1.24878369  |
| 16 | C | 6.53838955  | -0.33816309 | 2.59860041  |
| 17 | C | 5.13043068  | -0.39250911 | 3.02391431  |
| 18 | C | 7.64731007  | -0.45396964 | 3.43024903  |
| 19 | C | 8.83345381  | -0.33419422 | 2.62603654  |
| 20 | C | 10.21168821 | -0.38578898 | 3.08788873  |
| 21 | C | 10.53079383 | -0.72052935 | 4.35334024  |
| 22 | C | 11.87080808 | -0.80232990 | 4.87379930  |
| 23 | C | 12.26478363 | -1.20390823 | 6.13221617  |
| 24 | C | 13.67388588 | -1.15722522 | 6.29240861  |
| 25 | C | 14.35545848 | -0.71679364 | 5.15265814  |
| 26 | C | 15.75879048 | -0.70668457 | 5.41968775  |
| 27 | S | 17.23908185 | -0.33266824 | 4.64417636  |
| 28 | C | 18.17996270 | -0.75862816 | 6.07685880  |
| 29 | C | 19.62407048 | -0.64575620 | 6.04790783  |
| 30 | C | 20.37702074 | -0.99372917 | 7.18842760  |



|      |             |             |              |
|------|-------------|-------------|--------------|
| 31 C | 21.76485736 | -0.89881430 | 7.19114641   |
| 32 C | 22.43754619 | -0.43625565 | 6.04307891   |
| 33 N | 23.86267595 | -0.28257793 | 6.03196154   |
| 34 C | 24.56005922 | -0.02114480 | 7.26612676   |
| 35 C | 25.73832666 | -0.71944313 | 7.58782413   |
| 36 C | 26.42739158 | -0.39731842 | 8.75827461   |
| 37 C | 25.94584929 | 0.59565423  | 9.61631547   |
| 38 C | 24.76405846 | 1.27444591  | 9.30002729   |
| 39 C | 24.06871837 | 0.97949153  | 8.12755299   |
| 40 C | 24.61663676 | -0.69431394 | 4.87457174   |
| 41 C | 24.17134722 | -1.75351305 | 4.06262428   |
| 42 C | 24.89636847 | -2.09239688 | 2.91879470   |
| 43 C | 26.06506184 | -1.40119405 | 2.58670634   |
| 44 C | 26.51198061 | -0.35862160 | 3.40573353   |
| 45 C | 25.79476470 | 0.00444342  | 4.54527948   |
| 46 C | 21.69626265 | -0.08722393 | 4.89493453   |
| 47 C | 20.30908684 | -0.19317773 | 4.90224178   |
| 48 C | 17.35314899 | -1.16840593 | 7.09665768   |
| 49 C | 15.98022448 | -1.14045372 | 6.72863399   |
| 50 C | 14.65509593 | -1.47564440 | 7.42712760   |
| 51 C | 14.42261885 | -0.56276803 | 8.62967103   |
| 52 C | 14.59527485 | -2.95314610 | 7.81025556   |
| 53 S | 13.26121226 | -0.36320307 | 3.88678932   |
| 54 C | 8.89769012  | 0.31334454  | -2.52967643  |
| 55 C | 10.21918355 | 0.38230106  | -3.12846436  |
| 56 C | 11.41690191 | 0.52265707  | -2.53221527  |
| 57 C | 12.67257119 | 0.58873244  | -3.23914784  |
| 58 C | 13.92558239 | 0.78721241  | -2.69802474  |
| 59 C | 14.94205401 | 0.79166449  | -3.68722759  |
| 60 C | 16.46644894 | 0.95889181  | -3.68797151  |
| 61 C | 16.86992184 | 2.34136252  | -3.17877702  |
| 62 C | 17.14385359 | -0.16117749 | -2.90074235  |
| 63 C | 16.74427987 | 0.82196446  | -5.19138833  |
| 64 C | 15.55982992 | 0.61295949  | -5.90095689  |
| 65 S | 15.87565543 | 0.46168126  | -7.57705932  |
| 66 C | 17.61329106 | 0.67887314  | -7.34264177  |
| 67 C | 18.50178592 | 0.65133994  | -8.48637206  |
| 68 C | 19.89471263 | 0.76588151  | -8.29414404  |
| 69 C | 20.77444972 | 0.74262222  | -9.37062354  |
| 70 C | 20.27479179 | 0.61502250  | -10.68289884 |
| 71 N | 21.15902432 | 0.63239926  | -11.80737418 |
| 72 C | 22.41426278 | 1.33708355  | -11.72308439 |
| 73 C | 23.59721723 | 0.74210242  | -12.19906165 |
| 74 C | 24.79140211 | 1.46326599  | -12.15557161 |
| 75 C | 24.82094796 | 2.75811666  | -11.62897769 |
| 76 C | 23.64459228 | 3.33835777  | -11.14295018 |
| 77 C | 22.43744182 | 2.64083143  | -11.19151744 |
| 78 C | 20.91281632 | -0.22289216 | -12.93966547 |
| 79 C | 20.31231980 | -1.48419455 | -12.76886432 |
| 80 C | 20.05071435 | -2.27614044 | -13.88796520 |
| 81 C | 20.39364639 | -1.83340868 | -15.16890757 |
| 82 C | 21.00217470 | -0.58439292 | -15.33216789 |
| 83 C | 21.26046334 | 0.22794258  | -14.22822339 |
| 84 C | 18.88410632 | 0.49863455  | -10.88844603 |
| 85 C | 18.01545657 | 0.51410301  | -9.80169971  |
| 86 C | 17.90556879 | 0.85922516  | -6.01083766  |
| 87 C | 14.46195099 | 0.59467657  | -4.98704259  |
| 88 S | 12.76268442 | 0.40654971  | -4.98722955  |
| 89 C | 7.71302102  | 0.37370799  | -3.35998250  |
| 90 C | 6.59690461  | 0.27886810  | -2.54823331  |
| 91 C | 5.19545846  | 0.30775380  | -2.99542011  |

|       |             |             |              |
|-------|-------------|-------------|--------------|
| 92 H  | 2.25319583  | 2.16790081  | 0.00133830   |
| 93 H  | 4.73560044  | 2.16486073  | 0.00102289   |
| 94 H  | 2.25135933  | -2.16817759 | -0.00128206  |
| 95 H  | 4.73431070  | -2.16584542 | 0.00772832   |
| 96 H  | 4.65544853  | -1.34560074 | 2.73398707   |
| 97 H  | 5.02028611  | -0.30646738 | 4.11703372   |
| 98 H  | 4.52260192  | 0.41218215  | 2.57984783   |
| 99 H  | 7.64165933  | -0.60193579 | 4.49338622   |
| 100 H | 10.98257904 | -0.14467058 | 2.34761260   |
| 101 H | 9.74429376  | -0.96195102 | 5.08628043   |
| 102 H | 11.59101961 | -1.52247295 | 6.91922495   |
| 103 H | 19.86826447 | -1.35133997 | 8.08716024   |
| 104 H | 22.32420296 | -1.18501371 | 8.08326550   |
| 105 H | 26.11145007 | -1.50844623 | 6.93514456   |
| 106 H | 27.34714531 | -0.93099404 | 9.00479113   |
| 107 H | 26.48753097 | 0.83941962  | 10.52907611  |
| 108 H | 24.38422758 | 2.04659190  | 9.97165057   |
| 109 H | 23.15636801 | 1.52204475  | 7.87997825   |
| 110 H | 23.27162899 | -2.31176638 | 4.32045722   |
| 111 H | 24.54737169 | -2.90850931 | 2.28337247   |
| 112 H | 26.62695252 | -1.67413348 | 1.69467858   |
| 113 H | 27.42619717 | 0.18000647  | 3.14951305   |
| 114 H | 26.14148311 | 0.82427185  | 5.17428587   |
| 115 H | 22.20749990 | 0.27142387  | 3.99966552   |
| 116 H | 19.76563959 | 0.08862483  | 3.99649070   |
| 117 H | 17.68519813 | -1.48183087 | 8.07896533   |
| 118 H | 13.44371615 | -0.74876651 | 9.08812446   |
| 119 H | 15.18484547 | -0.71902401 | 9.40273850   |
| 120 H | 14.45531957 | 0.49693023  | 8.34620270   |
| 121 H | 14.77355247 | -3.60374298 | 6.94460925   |
| 122 H | 15.34985645 | -3.20029413 | 8.56693261   |
| 123 H | 13.61421411 | -3.21877640 | 8.22257155   |
| 124 H | 10.16001142 | 0.32013111  | -4.22871395  |
| 125 H | 11.53081123 | 0.60808511  | -1.44454114  |
| 126 H | 14.12781525 | 0.92575750  | -1.64152112  |
| 127 H | 16.58357610 | 2.47834162  | -2.12869956  |
| 128 H | 17.95413818 | 2.49173226  | -3.24773305  |
| 129 H | 16.38984979 | 3.14201968  | -3.75571461  |
| 130 H | 16.84380244 | -1.15183828 | -3.26519593  |
| 131 H | 18.23617737 | -0.10002011 | -2.97825397  |
| 132 H | 16.88499552 | -0.11268559 | -1.83571648  |
| 133 H | 20.29673531 | 0.86667321  | -7.28280835  |
| 134 H | 21.84812740 | 0.82042647  | -9.19254076  |
| 135 H | 23.58593515 | -0.27300548 | -12.59564304 |
| 136 H | 25.70903035 | 1.00774451  | -12.53236420 |
| 137 H | 25.75745016 | 3.31314444  | -11.59557216 |
| 138 H | 23.66727724 | 4.34769604  | -10.72785518 |
| 139 H | 21.52130821 | 3.10377481  | -10.82485599 |
| 140 H | 20.05613350 | -1.84750634 | -11.77382442 |
| 141 H | 19.57875952 | -3.25180932 | -13.75756814 |
| 142 H | 20.18933193 | -2.45903490 | -16.03649401 |
| 143 H | 21.27274115 | -0.23806186 | -16.33138404 |
| 144 H | 21.72573269 | 1.20429284  | -14.36293130 |
| 145 H | 18.48354042 | 0.40325055  | -11.89925839 |
| 146 H | 16.94346948 | 0.42598765  | -9.99726726  |
| 147 H | 18.89879188 | 1.01456792  | -5.60721535  |
| 148 H | 7.73047273  | 0.47337271  | -4.42975618  |
| 149 H | 4.70093263  | 1.25573056  | -2.72090056  |
| 150 H | 5.10346702  | 0.21097650  | -4.08961856  |
| 151 H | 4.59238331  | -0.50310377 | -2.55573301  |

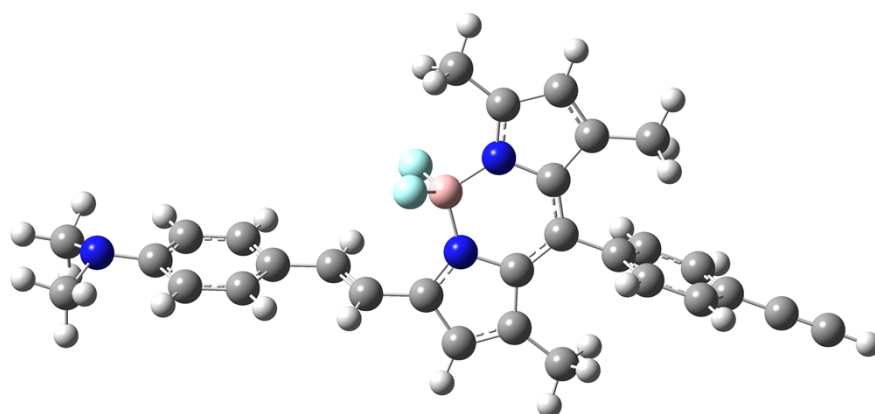

**Figure S3.** Energy-minimized geometry computed for **D1**. The Cartesian coordinates are given below:

|    |   |             |             |             |
|----|---|-------------|-------------|-------------|
| 1  | F | 0.00000000  | 0.00000000  | 0.00000000  |
| 2  | B | 1.38333734  | 0.00000000  | 0.00000000  |
| 3  | F | 1.72280642  | 1.33966440  | 0.00000000  |
| 4  | N | 1.91364532  | -0.70693921 | -1.28481931 |
| 5  | C | 2.68758648  | -1.91600429 | -1.22998610 |
| 6  | C | 3.06959670  | -2.48229127 | -0.01482818 |
| 7  | C | 3.87142267  | -3.73266380 | -0.01755965 |
| 8  | C | 5.27249356  | -3.66450108 | -0.03375902 |
| 9  | C | 6.02501810  | -4.83868551 | -0.03797686 |
| 10 | C | 5.37778516  | -6.08825602 | -0.02424566 |
| 11 | C | 6.14211797  | -7.28432108 | -0.02927757 |
| 12 | C | 6.79181318  | -8.30046608 | -0.03362421 |
| 13 | C | 3.97191746  | -6.15163706 | -0.00562735 |
| 14 | C | 3.22169119  | -4.97589716 | -0.00260075 |
| 15 | C | 2.72178066  | -1.90067035 | 1.21135661  |
| 16 | N | 1.93473013  | -0.70589896 | 1.27304782  |
| 17 | C | 1.78742551  | -0.33758080 | 2.57261491  |
| 18 | C | 1.07683237  | 0.84529222  | 3.04530211  |
| 19 | C | -0.25638012 | 0.98429040  | 2.98298778  |
| 20 | C | -0.99805803 | 2.14801935  | 3.47207185  |
| 21 | C | -0.35882854 | 3.31320990  | 3.93315992  |
| 22 | C | -1.09029300 | 4.40182660  | 4.39283442  |
| 23 | C | -2.50553431 | 4.36631050  | 4.40160507  |
| 24 | N | -3.25778815 | 5.53044585  | 4.72244993  |
| 25 | C | -4.67732132 | 5.31470536  | 5.12169594  |
| 26 | C | -2.59158711 | 6.53092229  | 5.60337919  |
| 27 | C | -3.15066200 | 3.19213083  | 3.94120591  |
| 28 | C | -2.40641804 | 2.11256978  | 3.48258383  |
| 29 | C | 2.47211560  | -1.28851340 | 3.40453873  |
| 30 | C | 3.04022547  | -2.25425329 | 2.57988137  |
| 31 | C | 3.83036948  | -3.41630696 | 3.01843159  |
| 32 | C | 2.93927280  | -2.30153620 | -2.60859922 |
| 33 | C | 3.69454355  | -3.48316239 | -3.05359075 |

|      |             |             |             |
|------|-------------|-------------|-------------|
| 34 C | 2.34071656  | -1.35147202 | -3.42458830 |
| 35 C | 1.70635111  | -0.36933505 | -2.58377130 |
| 36 C | 0.96767513  | 0.81964610  | -3.04248202 |
| 37 H | 5.77387520  | -2.69401143 | -0.04330595 |
| 38 H | 7.11568689  | -4.78917018 | -0.05250114 |
| 39 H | 7.35081170  | -9.17368663 | -0.03758977 |
| 40 H | 3.46974006  | -7.12105821 | 0.00646400  |
| 41 H | 2.13049823  | -5.02414906 | 0.01176488  |
| 42 H | 1.73038164  | 1.60908987  | 3.48052350  |
| 43 H | -0.87696319 | 0.18764910  | 2.55189511  |
| 44 H | 0.73281904  | 3.36765221  | 3.93130533  |
| 45 H | -0.56069466 | 5.28915630  | 4.74000242  |
| 46 H | -4.79401867 | 4.71188463  | 6.03676810  |
| 47 H | -5.16897770 | 6.28777001  | 5.29074166  |
| 48 H | -5.22541256 | 4.81533889  | 4.30322133  |
| 49 H | -1.61810700 | 6.82795871  | 5.17448350  |
| 50 H | -3.21087196 | 7.44261339  | 5.65824428  |
| 51 H | -2.42141792 | 6.17137339  | 6.63107948  |
| 52 H | -4.23814539 | 3.12697623  | 3.93501305  |
| 53 H | -2.92699669 | 1.21969178  | 3.12747113  |
| 54 H | 2.51358593  | -1.23909157 | 4.47510676  |
| 55 H | 3.86837331  | -3.50943935 | 4.11501088  |
| 56 H | 3.42373282  | -4.36488184 | 2.62996243  |
| 57 H | 4.87422171  | -3.35654866 | 2.66646126  |
| 58 H | 4.73813277  | -3.46338872 | -2.69578163 |
| 59 H | 3.25329676  | -4.42073517 | -2.67463127 |
| 60 H | 3.73539885  | -3.56951217 | -4.15075757 |
| 61 H | 2.33417650  | -1.32694496 | -4.49723486 |
| 62 H | 1.51573047  | 1.75344440  | -2.82146671 |
| 63 H | 0.79242449  | 0.80327966  | -4.13021911 |
| 64 H | -0.02049270 | 0.92414674  | -2.56202619 |

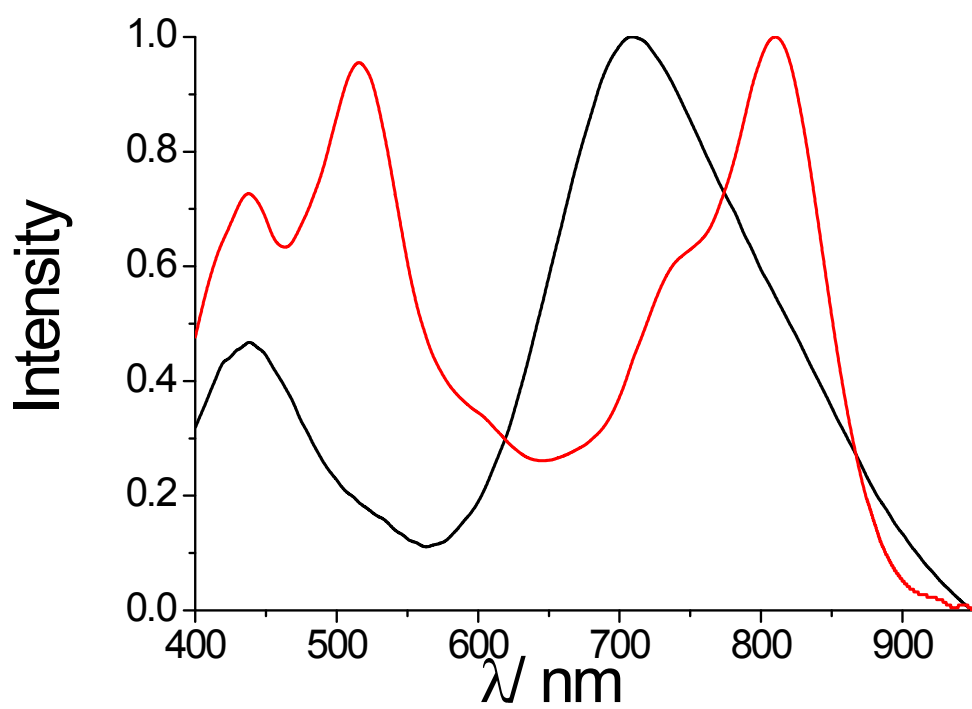

**Figure S4.** Absorption spectra recorded before (red curve) and after (black curve) illumination with white light of **A1** in deoxygenated CH<sub>2</sub>Cl<sub>2</sub>.

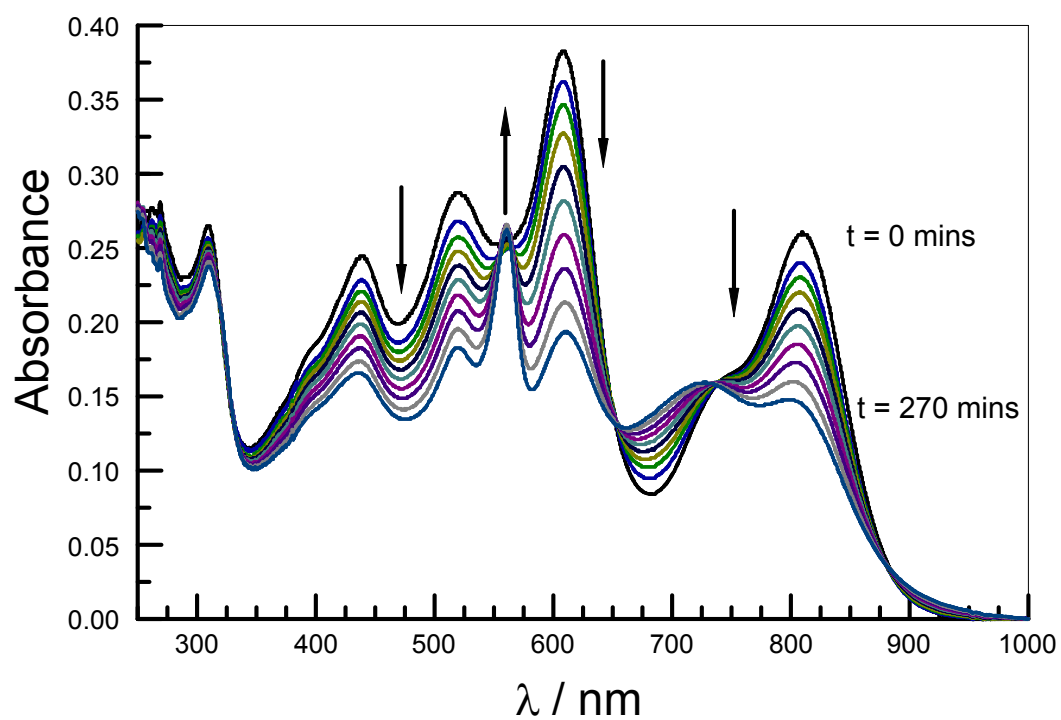

**Figure S5.** Absorption spectra recorded during the early stages of photolysis of **1** in deoxygenated CH<sub>2</sub>Cl<sub>2</sub>, spectra being recorded at 30 minute intervals. Note the series of isosbestic points.

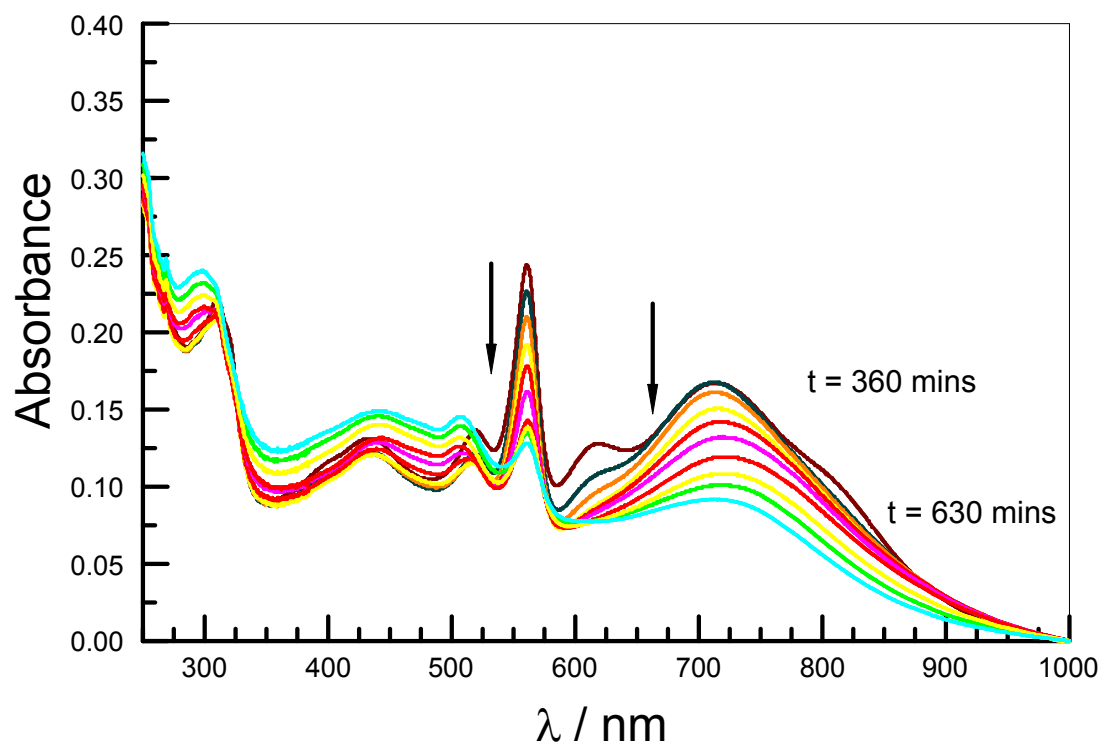

**Figure S6.** Absorption spectra recorded during the later stages of photolysis of **1** in deoxygenated CH<sub>2</sub>Cl<sub>2</sub>, spectra being recorded at 30 minute intervals. Note the series of isosbestic points.

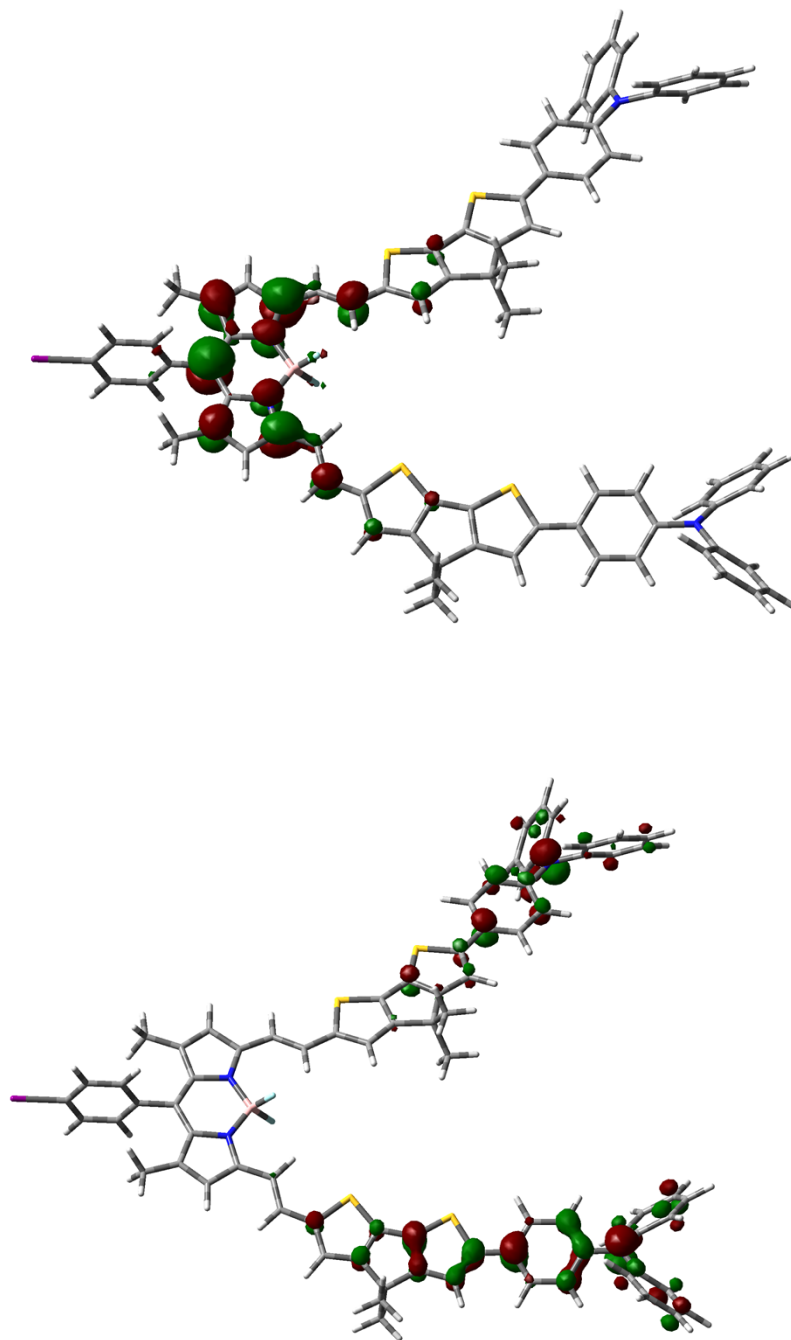

**Figure S7.** Kohn-Sham molecular orbital representations for **A1** at an isodensity of 0.015 shown for the LUMO (top) and the HOMO (lower).



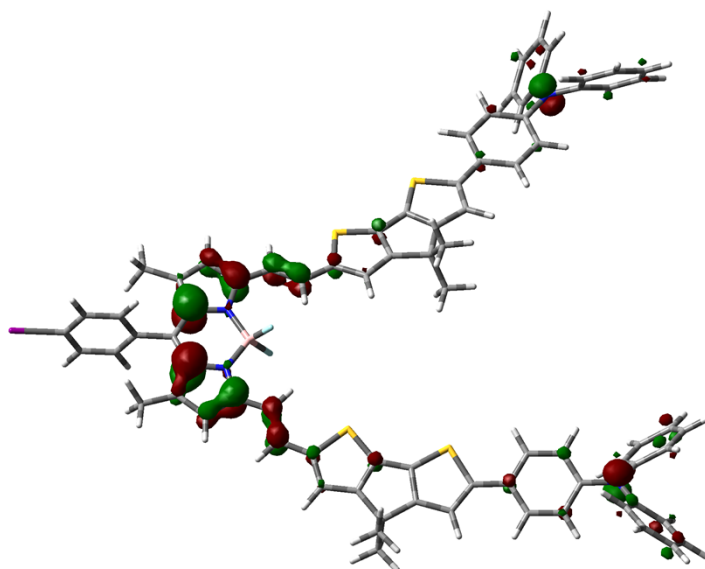

**Figure S8.** Kohn-Sham molecular orbital representation for **A1** at an isodensity of 0.015 shown for the HOMO(-2).

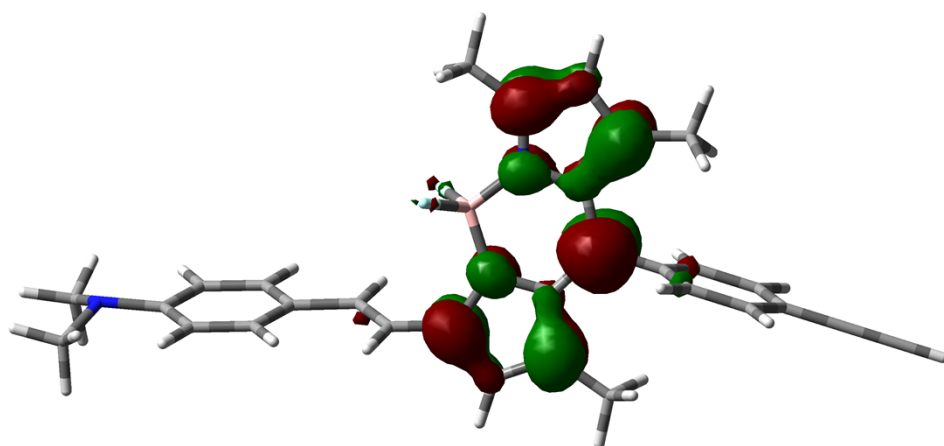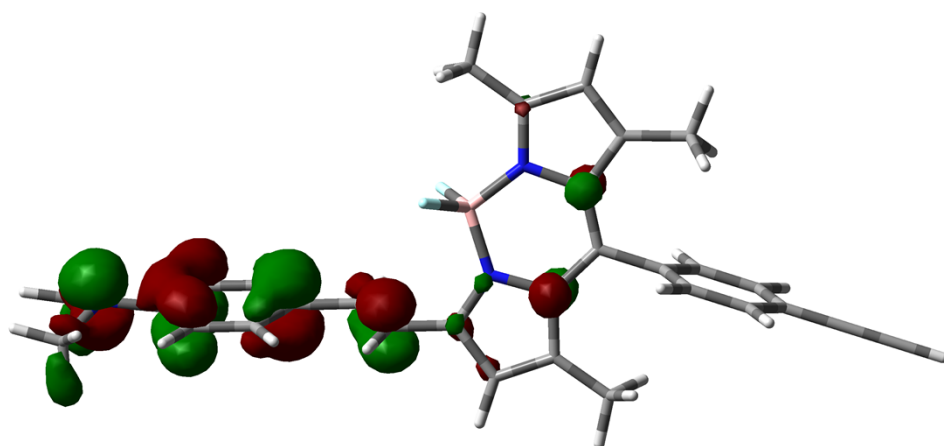

**Figure S9.** Kohn-Sham molecular orbital representation for **D1** at an isodensity of 0.015 shown for the LUMO (upper) and the HOMO (lower).

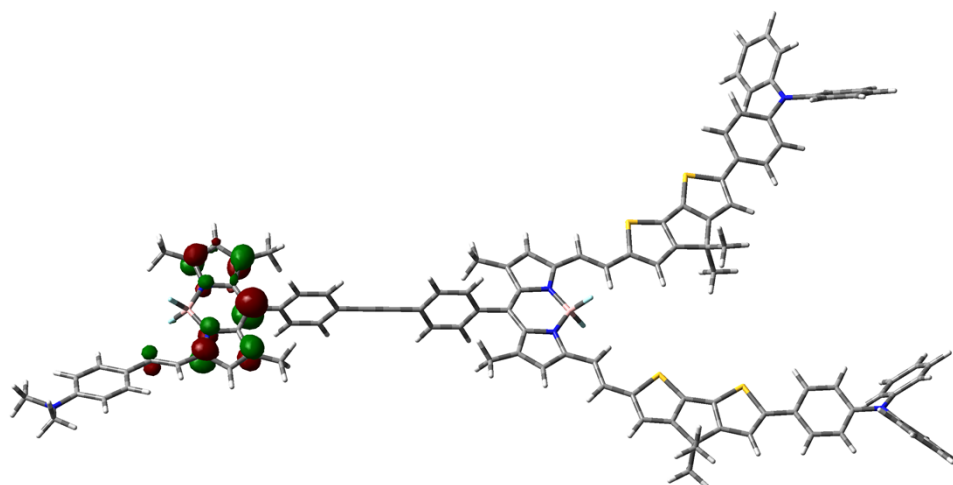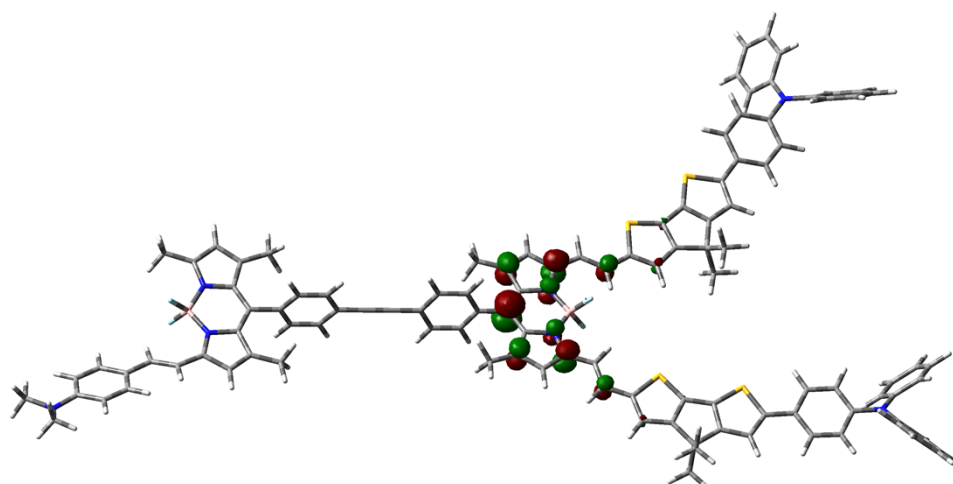

**Figure S10.** Kohn-Sham molecular orbital representation for **1** at an isodensity of 0.015 shown for the LUMO (lower) and the LUMO(1) (upper).

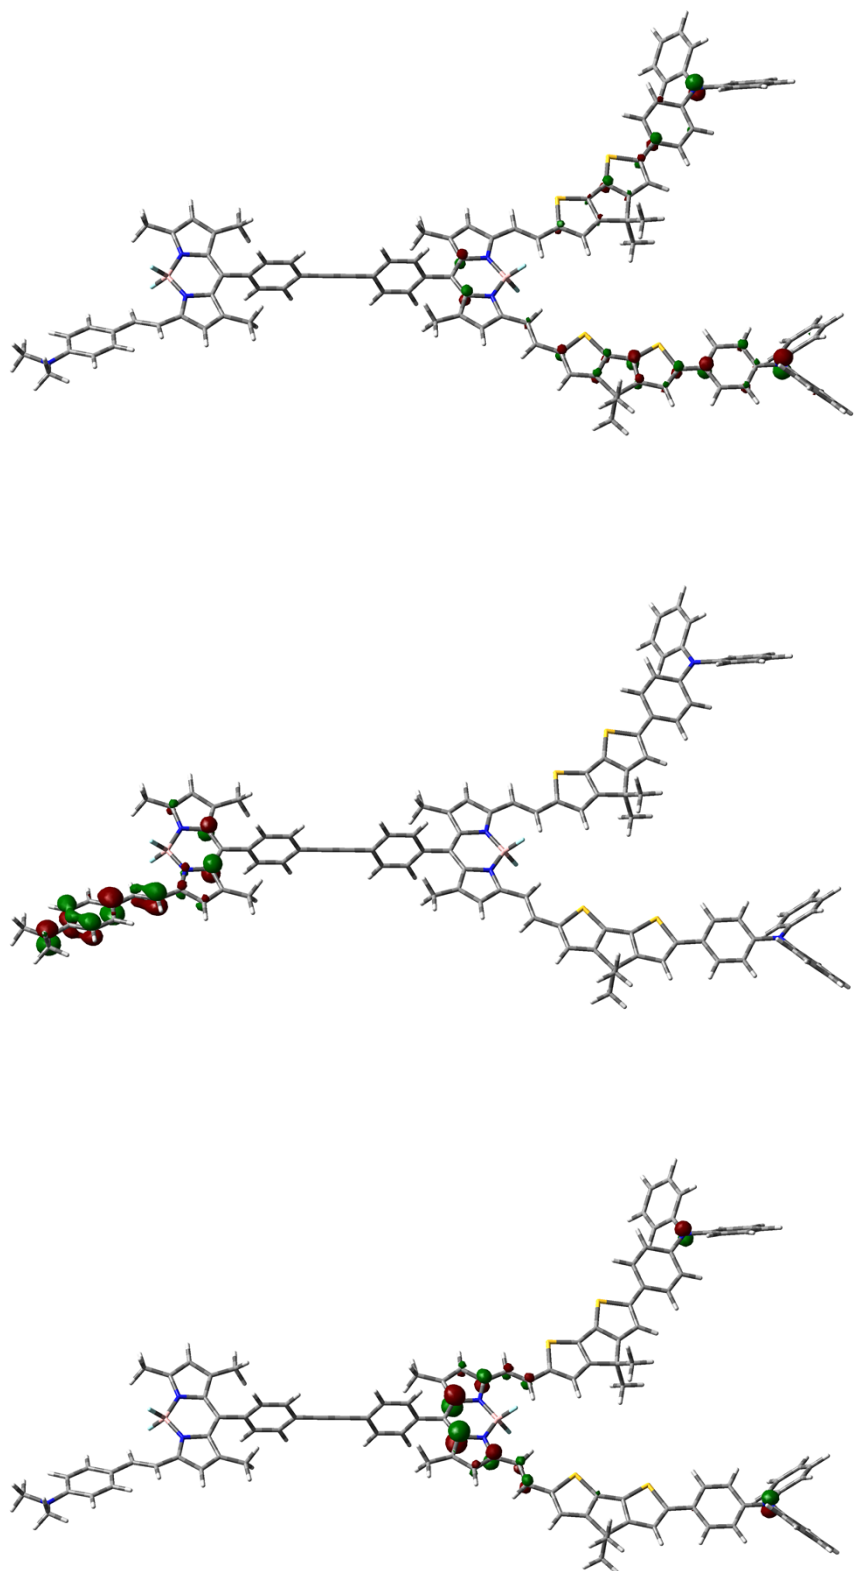

**Figure S11.** Kohn-Sham molecular orbital representation for **1** at an isodensity of 0.015 shown for the HOMO (upper), the HOMO(-1) (centre) and the HOMO(-2) (lower).
